# Supplementary material for: Determination of sample size for a multi-class classifier based on single-nucleotide polymorphisms: a volume under the surface approach
Source: Springer Nature journal article supplement (doi:10.1186/1471-2105-15-190), 2014-06-14
Supplement: 12859_2013_6454_MOESM1_ESM.pdf [file 12859_2013_6454_MOESM1_ESM.pdf]

# Package ‘SampleSizeSNP’

January 21, 2014

**Type** Package

**Title** Sample size determination for classifier based on SNP.

**Version** 1.0

**Date** 2012-11-07

**Author** Xinyu Liu <xinyu81@uga.edu>

**Maintainer** Xinyu Liu <xinyu81@uga.edu>

**Depends** mvtnorm, geometry, DEoptim, e1071, ROCR, pROC

**Description** This package implements a version of sample size determination for SNP classifier. It can be based on the Probability of Correct Classification (PCC) or Area Under Curve (AUC).

**License** GPL-2

## R topics documented:

|                             |    |
|-----------------------------|----|
| AUC.inf . . . . .           | 2  |
| AUC.n . . . . .             | 3  |
| AUC.Simulation . . . . .    | 4  |
| Compute.MAF . . . . .       | 5  |
| Find.SS.AUC . . . . .       | 6  |
| Find.SS.PCC . . . . .       | 7  |
| Find.SS.VUS . . . . .       | 9  |
| Generate.Theta . . . . .    | 10 |
| Hapmap51 . . . . .          | 11 |
| Hapmap92 . . . . .          | 12 |
| HS348 . . . . .             | 13 |
| PCC.inf.optimal . . . . .   | 14 |
| PCC.n.optimal . . . . .     | 15 |
| ROC.4Figures . . . . .      | 16 |
| ROC.infinity.plot . . . . . | 18 |
| ROC.n.plot . . . . .        | 19 |
| VUS.inf . . . . .           | 20 |
| VUS.n . . . . .             | 21 |

|              |           |
|--------------|-----------|
| <b>Index</b> | <b>23</b> |
|--------------|-----------|

AUC.inf

*Compute the AUC under theoretical maximum PCC.*

---

**Description**

Compute the AUC under theoretical maximum PCC.

**Usage**

```
AUC.inf(theta1, theta2, rho)
```

**Arguments**

|        |                                                                   |
|--------|-------------------------------------------------------------------|
| theta1 | The MAF of case groups.                                           |
| theta2 | The MAF of control groups.                                        |
| rho    | The percentage of SNP's with effect on case/control, default = 1. |

**Value**

The AUC value.

**Author(s)**

Xinyu Liu

**References**

Liu, X., et al. Sample size determination for classifiers based on single-nucleotide polymorphisms. *Biostatistics* (2012), 13:2, 217-227.

**Examples**

```
m <- 10 # number of SNPs
h <- 0.1 # the difference between two MAFs
theta1 <- rep(0.3,10)
theta2 <- theta1 - 0.1
AUC.inf(theta1, theta2, rho=1)
#####
data(Hapmap51)
AUC.inf(Hapmap51$theta1, Hapmap51$theta2, rho=1)
```

---

|       |                                     |
|-------|-------------------------------------|
| AUC.n | <i>AUC under linear classifier.</i> |
|-------|-------------------------------------|

---

**Description**

The AUC of the linear classifier.

**Usage**

```
AUC.n(n1, n2, theta1, theta2, alpha, rho)
```

**Arguments**

|        |                                                                  |
|--------|------------------------------------------------------------------|
| n1     | The number of observations in case group.                        |
| n2     | The number of observation in control groups.                     |
| theta1 | The MAF for case groups.                                         |
| theta2 | The MAF for control groups.                                      |
| alpha  | The significant level to select the SNPs, default = 0.1.         |
| rho    | The percentage of SNPs with effect on case/control, default = 1. |

**Value**

The AUC number based on the linear classifier.

**Author(s)**

Xinyu Liu

**References**

Liu, X., et al. Sample size determination for classifiers based on single-nucleotide polymorphisms. *Biostatistics* (2012), 13:2, 217-227.

**Examples**

```
m <- 10 # number of SNPs
h <- 0.1 # the difference between two MAFs
n1 <- 50
n2 <- 50
theta1 <- rep(0.3,m)
theta2 <- theta1 - 0.1
alpha <- 0.01
rho=1
AUC.n(n1, n2, theta1, theta2,alpha,rho)
#####
data(Hapmap51)
AUC.n(n1, n2, Hapmap51$theta1, Hapmap51$theta2,alpha,rho)
```

---

|                |                                                                              |
|----------------|------------------------------------------------------------------------------|
| AUC.Simulation | <i>Compute the values for PCC(inf), PCC(n)_f, PCC(n)_MC, and PCC(n)_SVM.</i> |
|----------------|------------------------------------------------------------------------------|

---

**Description**

Compute the values for PCC(inf), PCC(n)\_f, PCC(n)\_MC, and PCC(n)\_SVM.

**Usage**

```
AUC.Simulation(h_list,m_list,alpha_list,n_list,low,high,bin_num,pi_1,rho,kkk)
```

**Arguments**

|            |                                        |
|------------|----------------------------------------|
| h_list     | The list of h values.                  |
| m_list     | The list of m values.                  |
| alpha_list | The list of alpha values.              |
| n_list     | The list of n values.                  |
| low        | Lower bound of threshold K's.          |
| high       | Upper bound of threshold K's.          |
| bin_num    | The number of bins for threshold.      |
| pi_1       | The percentage of group 1.             |
| rho        | The percentage of significant SNP's.   |
| kkk        | The times of repeat in the simulation. |

**Details**

Compute the values for PCC(inf), PCC(n)\_f, PCC(n)\_MC, and PCC(n)\_SVM.

**Value**

The sample size.

**Author(s)**

Xinyu Liu

**References**

Liu, X., et al. Sample size determination for classifiers based on single-nucleotide polymorphisms. *Biostatistics* (2012), 13:2, 217-227.

**Examples**

```

theta1 <- 0.3
alpha = 0.01
rho = 1
low=-10
high=200
bin_num=5000
pi_1=pi_2=0.5
kkk=200
h_list = c(0.01,0.05,0.1,0.2)
m_list = c(10,50,200)
alpha_list = c(0.01)
n_list = c(30,100,200)
#AUC.Simulation(h_list,m_list,alpha_list,n_list,low,high,bin_num,pi_1,rho,kkk)

```

---

Compute.MAF

---

*Compute the MAF given the sample.*


---

**Description**

To determine the sample size, the minor allele frequency (MAF) of case and control groups are needed; if they are not available, then the initial sample of the SNP data with case/control labels are required, and the MAF of two groups will be estimated by MLE.

**Usage**

```
Compute.MAF(data, label)
```

**Arguments**

|       |                                                                                                                                                                                                  |
|-------|--------------------------------------------------------------------------------------------------------------------------------------------------------------------------------------------------|
| data  | The SNP data set, which is encoded by the number of minor allele.                                                                                                                                |
| label | The label of case/control, please be note that the case group is labeled by higher number and corresponds to theta1, and the control group is labeled by lower number and corresponds to theta2. |

**Value**

MLE of theta1 and theta2.

**Author(s)**

Xinyu Liu

**References**

Liu, X. et al. (2012) Sample size determination for classifiers based on single-nucleotide polymorphisms. *Biostatistics*, 13:2, 217-277.

**Examples**

```

data(Hapmap51)
Compute.MAF(Hapmap51$data,Hapmap51$labels)

```

---

Find.SS.AUC

*Determine the sample size based on the AUC.*


---

### Description

Find the sample size such that  $AUC(\infty) - AUC(n) < \text{diff}$

### Usage

Find.SS.AUC(RequestDifference, diff, pi\_1, theta1, theta2, alpha, rho)

### Arguments

RequestDifference

If TRUE, then it will find the sample size such that  $AUC(\text{inf}) - AUC(n) < \text{diff}$ , if FALSE, then it will find that sample size such that  $1 - AUC(n) < \text{diff}$ . Please see the details and examples.

diff

The threshold of  $AUC(\infty) - AUC(n)$ .

pi\_1

The percentage of case group in sample data, so  $n1/n2 = \text{pi}_1 / (1 - \text{pi}_1)$

theta1

The MAF of case group.

theta2

The MAF of control group.

alpha

The significant level of selecting the SNPs by Wald test, default = 0.01.

rho

The percentage of SNP with the effect on case/control, default = 1.

### Details

This function determines the sample size needed according to AUC, it is divided into two parts, the first part as stated in the paper, is to find the sample size,  $n$ , such that  $AUC(\infty) - AUC(n) < \text{diff}$ . The second part ignores the  $AUC(\infty)$ , only consider the  $AUC(n)$ , and find the sample size,  $n$ , such that  $1 - AUC(n) < \text{diff}$ , or  $1 - \text{diff} < AUC(n)$ . But before that, please be note that the  $AUC(n)$  can not exceed  $AUC(\infty)$ , and can not be lower than  $AUC(n)$ , so remember to check the range of  $AUC(n)$  before setting the threshold  $\text{diff}$ . Please see the examples for more details.

### Value

The sample size.

### Author(s)

Xinyu Liu

### References

Liu, X., et al. Sample size determination for classifiers based on single-nucleotide polymorphisms. *Biostatistics* (2012), 13:2, 217-227.

**Examples**

```

data(Hapmap51)
### first find the theoretical maximum value of AUC, AUC(infinity).
AUC.inf(Hapmap51$theta1,Hapmap51$theta2,rho=1)
### second find the lowest value of AUC.
AUC.n(1,1,Hapmap51$theta1,Hapmap51$theta2,alpha=0.1,rho=1)
### so the AUC(n) should be between these two values.

### Or you can make the plot of AUC(n) and AUC(inf)
res <- matrix(NA, nrow=1,ncol=100)
for (i in 1:100)
{
  res[1,i] <- AUC.n(i*5,i*5,Hapmap51$theta1,Hapmap51$theta2,alpha=0.1,rho=1)
}
plot(10*seq(100),res,type="l",lwd=3,xlab="Sample Size",ylab="AUC") #please be note that the sample size is 2
abline(h = AUC.inf(Hapmap51$theta1,Hapmap51$theta2,rho=1),lwd=3)

### Then you can find the sample size according to the threshold, diff.
### if you want to find the sample size such that AUC(inf)-AUC(n) < diff, then you can use
Find.SS.AUC(RequestDifference=TRUE, diff=0.01,pi_1=0.5,theta1=Hapmap51$theta1,theta2=Hapmap51$theta2,alpha=0.1,rho=1)

### or you just want to control AUC(n) and ignore AUC(infinity), then the formula becomes
### 1- AUC(n) < diff, or AUC(n) > 1 - diff, you can use
Find.SS.AUC(RequestDifference=FALSE, diff=0.3,pi_1=0.5,theta1=Hapmap51$theta1,theta2=Hapmap51$theta2,alpha=0.1,rho=1)

```

Find.SS.PCC

*Compute the sample size based on PCC.***Description**

Find the sample size such that  $PCC(\infty) - PCC(n) < \text{diff}$

**Usage**

```
Find.SS.PCC(RequestDifference, diff, pi_1, theta1, theta2, alpha, rho)
```

**Arguments**

|                   |                                                                                                                                                                                                                      |
|-------------------|----------------------------------------------------------------------------------------------------------------------------------------------------------------------------------------------------------------------|
| RequestDifference | If TRUE, then it will find the sample size such that $PCC(\infty) - PCC(n) < \text{diff}$ , if FALSE, then it will find that sample size such that $1 - PCC(n) < \text{diff}$ . Please see the details and examples. |
| diff              | The threshold for the difference of two PCCs.                                                                                                                                                                        |
| pi_1              | The percentage of the case group, so $n1/n2 = pi\_1/(1-pi\_1)$ .                                                                                                                                                     |
| theta1            | The MAF of case group.                                                                                                                                                                                               |
| theta2            | The MAF of control group.                                                                                                                                                                                            |
| alpha             | The significant level to choose the SNPs, default = 0.1.                                                                                                                                                             |
| rho               | The percentage of SNP with effect on case/control, default = 1.                                                                                                                                                      |

## Details

This function determines the sample size needed according to PCC, it is divided into two parts, the first part as stated in the paper, is to find the sample size,  $n$ , such that  $PCC(\infty) - PCC(n) < \text{diff}$ . The second part ignores the  $PCC(\infty)$ , only consider the  $PCC(n)$ , and find the sample size,  $n$ , such that  $1 - PCC(n) < \text{diff}$ , or  $1 - \text{diff} < PCC(n)$ . But before that, please be note that the  $PCC(n)$  can not exceed  $PCC(\infty)$ , and can not be lower than  $PCC(n)$ , so remember to check the range of  $PCC(n)$  before setting the threshold  $\text{diff}$ . Please see the examples for more details.

## Value

The sample size.

## Author(s)

Xinyu Liu

## References

Liu, X., et al. Sample size determination for classifiers based on single-nucleotide polymorphisms. *Biostatistics* (2012), 13:2, 217-227.

## Examples

```
data(Hapmap51)
### first find the theoretical maximum value of PCC, PCC(infinity).
PCC.inf.optimal(Hapmap51$theta1,Hapmap51$theta2,pi_1=0.5,rho=1)
### second find the lowest value of PCC.
PCC.n.optimal(1,Hapmap51$theta1,Hapmap51$theta2,pi_1=0.5,alpha=0.1,rho=1)
### so the PCC(n) should between these two values.

### Or you can make the plot of AUC(n) and AUC(inf)
res <- matrix(NA, nrow=1,ncol=100)
for (i in 1:100)
{
  res[1,i] <- PCC.n.optimal(i*5,Hapmap51$theta1,Hapmap51$theta2,pi_1=0.5,alpha=0.1,rho=1)
}
plot(10*seq(100),res,type="l",lwd=3,xlab="Sample Size",ylab="PCC") #please be note that the sample size is 2*
abline(h = PCC.inf.optimal(Hapmap51$theta1,Hapmap51$theta2,pi_1=0.5,rho=1),lwd=3)

### Then you can find the sample size according to the threshold, diff.
### if you want to find the sample size such that PCC(inf)-PCC(n) < diff, then you can use
Find.SS.PCC(RequestDifference=TRUE, diff=0.01,pi_1=0.5,theta1=Hapmap51$theta1,theta2=Hapmap51$theta2,alpha=0.1,rho=1)

### or you just want to control PCC(n) and ignore PCC(infinity), then the formula becomes
### 1- PCC(n) < diff, or PCC(n) > 1 - diff, you can use
Find.SS.PCC(RequestDifference=FALSE, diff=0.3,pi_1=0.5,theta1=Hapmap51$theta1,theta2=Hapmap51$theta2,alpha=0.1,rho=1)
```



---

Find.SS.VUS

*Determine the sample size based on the VUS.*


---

**Description**

Find the sample size such that  $VUS(\infty) - VUS(n) < \text{diff}$

**Usage**

Find.SS.VUS(diff,C,Theta,alpha,m,kk,rho,abserr)

**Arguments**

|        |                                                                                   |
|--------|-----------------------------------------------------------------------------------|
| diff   | The threshold of $VUS(\infty) - VUS(n)$ .                                         |
| C      | Number of groups.                                                                 |
| Theta  | The MAF matrix, with m rows and C columns.                                        |
| alpha  | The significant level of selecting the SNPs by Wald test.                         |
| m      | Number of SNP's.                                                                  |
| kk     | The number of random values generated to compute the integration by qhull method. |
| rho    | The percentage of SNP with the effect on case/control, default = 1.               |
| abserr | The cutoff of the error.                                                          |

**Details**

This function determines the sample size needed according to VUS, it is divided into two parts, the first part as stated in the paper, is to find the sample size, n, such that  $VUS(\infty) - VUS(n) < \text{diff}$ . The second part ignores the  $VUS(\infty)$ , only consider the  $VUS(n)$ , and find the sample size, n, such that  $1 - VUS(n) < \text{diff}$ , or  $1 - \text{diff} < VUS(n)$ . But before that, please be note that the  $VUS(n)$  can not exceed  $VUS(\infty)$ , and can not be lower than  $VUS(n)$ , so remember to check the range of  $VUS(n)$  before setting the threshold diff. Please see the examples for more details.

**Value**

The sample size.

**Author(s)**

Xinyu Liu

**References**

Liu, X., et al. Sample size determination for classifiers based on single-nucleotide polymorphisms. *Biostatistics* (2012), 13:2, 217-227.

**Examples**

```

rho = 1
alpha=0.01
C=3
kk=100
kkk=200
rr=10
U1=0.4
U2=0.49
Di=0.002
abserr = 0.001
ms = 1
diff <- 0.01
theta_1_list = c(0.3)
h_list = c(0.05,0.1,0.15)
m_list = c(30,50,100,200)
alpha_list = c(0.01)
rho=1
#Results_Tab3 = matrix(ncol=4,nrow=length(theta_1_list)*length(h_list)*length(m_list)*length(alpha_list))
#colnames(Results_Tab3) <- c("h","m","alpha","Size")
#mm = 1
#for (theta1 in theta_1_list)
#{
#  for (h in h_list)
#  {
#    for (m in m_list)
#    {
#      for (alpha in alpha_list)
#      {
#        ll <- m
#        Theta <- Generate.Theta(C,m,U1,U2,h,Di,rho)$Theta
#        SampleS <- Find.SS.VUS(diff,C,Theta,alpha,m,kk,rho,abserr)
#        Results2 <- c(h,m,alpha,SampleS)
#        print(Results2)
#        Results_Tab3[mm,] <- Results2
#        mm = mm + 1
#      }
#    }
#  }
#}

```

---

Generate.Theta

*Generate matrix of MAF randomly.*


---

**Description**

This function produces the MAF matrix randomly, which is  $m \times C$ , that is, each column corresponds to the MAF of  $m$  SNP's for one class. In this program, given  $\text{SNP}_i$ ,  $\theta_{i1} \sim U(U1,U2)$ ,  $h_1, h_2, \dots, h_{(C-1)} \sim U(h-Di, h+Di)$ ,  $\theta_{i2} = \theta_{i1} - h_1$ ,  $\theta_{i3} = \theta_{i2} - h_2$ , and so on.

If  $\rho < 1$ , then for each SNP ( $C$  groups) there is  $\rho$  percentage that  $\theta_{i1}, \dots, \theta_{iC} \sim U(0.1, 0.4)$

**Usage**

```
Generate.Theta(C,m,U1,U2,h,Di,rho)
```

**Arguments**

|     |                                                                   |
|-----|-------------------------------------------------------------------|
| C   | Number of groups.                                                 |
| m   | Number of SNP's.                                                  |
| U1  | theta_i1 ~ U(U1,U2).                                              |
| U2  | theta_i1 ~ U(U1,U2).                                              |
| h   | h1,h2,...,h_(C-1) ~ U(h-Di,h+Di).                                 |
| Di  | h1,h2,...,h_(C-1) ~ U(h-Di,h+Di).                                 |
| rho | The percentage of SNP's with effect on case/control, default = 1. |

**Value**

\$Theta: MAF matrix, with m rows and C columns. \$significant\_index : if 0, then theta\_i1,...,theta\_iC ~ U(0.1,0.4), if 1, then theta\_i1 ~ U(U1,U2), h1,h2,...,h\_(C-1) ~ U(h-Di,h+Di), theta\_i2 = theta\_i1 - h1, theta\_i3 = theta\_i2 - h2, and so on.

**Author(s)**

Xinyu Liu

**References**

Liu, X., et al. Sample size determination for classifiers based on single-nucleotide polymorphisms. *Biostatistics* (2012), 13:2, 217-227.

**Examples**

```
rho = 1
C=3
U1=0.4
U2=0.49
Di=0.002
h = 0.1
m = 50
Theta <- Generate.Theta(C,m,U1,U2,h,Di,rho)$Theta
Theta
```

---

Hapmap51

*The 51 selected encoded SNPs*

---

**Description**

The class is made of three elements, the first one "Hapmap51\$data" is the SNPs data, it is from the encoded Hapmap data, and the 51 SNPs are selected by the "independent criteria" which is described by the paper below. The second one "Hapmap51\$labels" are the labels of the case/control. "Hapmap51\$theta1" and "Hapmap51\$theta2" are MAF of case and control groups, respectively, which are estimated by maximum likelihood method.

**Usage**

```
Hapmap51
```

**References**

Liu, X., et al. Sample size determination for classifiers based on single-nucleotide polymorphisms. *Biostatistics* (2012), 13:2, 217-227.

**Examples**

```
data(Hapmap51)
dim(Hapmap51$data)
Hapmap51$data[1:10, 1:10]
Hapmap51$labels
Hapmap51$theta1
Hapmap51$theta2
```

---

Hapmap92

*The 92 selected encoded SNPs*

---

**Description**

The class is made of three elements, the first one "Hapmap92\$data" is the SNPs data, it is from the encoded Hapmap data, and the 92 SNPs are selected by the "independent criteria" which is described by the paper below. The second one "Hapmap92\$labels" are the labels of the population. "Hapmap92\$Theta" are MAF matrix, which are estimated by maximum likelihood method. The labels and corresponding number:

0 – African ancestry in Southwest USA (ASW, 87) 1 – Utah residents with Northern and Western European ancestry from the CEPH collection (CEU, 165) 2 – Han Chinese in Beijing, China (CHB, 137) 3 – Chinese in Metropolitan Denver, Colorado (CHD, 109) 4 – Gujarati Indians in Houston, Texas (GIH, 101) 5 – Japanese in Tokyo, Japan (JPT, 113) 6 – Luhya in Webuye, Kenya (LWK, 110) 7 – Mexican ancestry in Los Angeles, California (MEX, 86) 8 – Maasai in Kinyawa, Kenya (MKK, 184) 9 – Toscani in Italia (TSI, 102) 10 – Yoruba in Ibadan, Nigeria (YRI, 203)

**Usage**

```
Hapmap92
```

**References**

Liu, X., et al. Sample size determination for classifiers based on single-nucleotide polymorphisms. *Biostatistics* (2012), 13:2, 217-227.

**Examples**

```
data(Hapmap92)
dim(Hapmap92$data)
Hapmap92$data[1:10, 1:10]
Hapmap92$labels[1:10]
Hapmap92$Theta[1:5, ]
Theta3 <- Hapmap92$Theta[, c(3, 4, 6)]
rho = 1
```

```

abserr = 0.001
kk = 100
ll = m = 92
C <- 3
alpha <- 0.1
abserr = 0.001
n <- 100
N <- matrix(n,nrow=C,ncol=1)
#VUS.inf(C,ll,Theta3,kk,abserr) #0.6177627
#VUS.n(C,Theta3,alpha,N,m,rho,kk,abserr) #0.4245822

```

---

HS348

---

*The 348 selected encoded SNPs from Heterogeneous Stock Mice Data*


---

### Description

The class is made of five elements, the first one "data" is the SNPs data, it is from the encoded Heterogeneous Stock Mice data, and the 348 SNPs are selected by the "independent criteria" which is described by the paper below. "Anx\_label\_C3" is the categorical label of Anxiety according to its distribution, the cutoffs are 0.1 and 0.6. "MAF.Anx.C3" is the MAF according to the label "Anx\_label\_C3". Similarly, "ObeBMI\_label\_C4" are the categorical labels of Obesity BMI, the cutoffs are the four quantiles of Obesity BMI.

### Usage

```
HS348
```

### References

Liu, X., et al. Sample size determination for classifiers based on single-nucleotide polymorphisms. *Biostatistics* (2012), 13:2, 217-227.

### Examples

```

data(HS348)
dim(HS348$data)
HS348$data[1:10,1:10]
rho = 1
abserr = 0.01
kk = 100
ll = m = 348
C <- 3
alpha <- 0.01
n <- 100
N <- matrix(n,nrow=C,ncol=1)
#Theta <- HS348$MAF.Anx.C3
#VUS.inf(C,ll,Theta,kk,abserr) #0.6921208
#VUS.n(C,Theta,alpha,N,m,rho,kk,abserr) #0.2467791
#Theta <- HS348$ObeBMI_MAF_C4

```

---

PCC.inf.optimal      *The theoretical maximum value of PCC.*

---

### Description

The theoretical maximum value of PCC, which is computed from the assumptions and Bayesian formula.

### Usage

```
PCC.inf.optimal(theta1, theta2, pi_1, rho)
```

### Arguments

|        |                                                                 |
|--------|-----------------------------------------------------------------|
| theta1 | The MAF for case group.                                         |
| theta2 | The MAF for control group.                                      |
| pi_1   | The percentage of case group.                                   |
| rho    | The percentage of SNP with effect on case/control, default = 1. |

### Value

The PCC(infinity) value.

### Author(s)

Xinyu Liu

### References

Liu, X., et al. Sample size determination for classifiers based on single-nucleotide polymorphisms. *Biostatistics* (2012), 13:2, 217-227.

### Examples

```
m <- 10
h <- 0.1
theta1 <- rep(0.3,m)
theta2 <- theta1 - h
pi_1 <- 0.5
PCC.inf.optimal(theta1, theta2, pi_1,rho=1)
#####
data(Hapmap51)
PCC.inf.optimal(theta1=Hapmap51$theta1, theta2=Hapmap51$theta2, pi_1,rho=1)
```

PCC.n.optimal

*The PCC under the linear classifier.***Description**

PCC(n)

**Usage**

PCC.n.optimal(n1, theta1, theta2, pi\_1, alpha, rho)

**Arguments**

|        |                                                                 |
|--------|-----------------------------------------------------------------|
| n1     | The number of case group.                                       |
| theta1 | The MAF of case group.                                          |
| theta2 | The MAF of control group.                                       |
| pi_1   | The percentage of case group.                                   |
| alpha  | The significant level to select SNP, default = 0.1.             |
| rho    | The percentage of SNP with effect on case/control, default = 1. |

**Value**

PCC(n)

**Author(s)**

Xinyu Liu

**References**

Liu, X., et al. Sample size determination for classifiers based on single-nucleotide polymorphisms. *Biostatistics* (2012), 13:2, 217-227.

**Examples**

```

m <- 10
h <- 0.2
n1 <- 50
pi_1 <- 0.5
alpha <- 0.01
rho=1
theta1 <- rep(0.3,m)
theta2 <- theta1 - h
PCC.n.optimal(n1, theta1, theta2, pi_1,alpha,rho)

#####3
data(Hapmap51)
n1 <- 50
pi_1 <- 0.5
theta1 <- Hapmap51$theta1
theta2 <- Hapmap51$theta2
alpha <- 0.1

```

```
rho=1
PCC.n.optimal(n1, theta1, theta2, pi_1,alpha,rho)
```

---

ROC.4Figures                      *The ROC figures for PCC(inf), PCC(n)\_f, PCC(n)\_MC, and PCC(n)\_SVM.*

---

### Description

The ROC figures for PCC(inf), PCC(n)\_f, PCC(n)\_MC, and PCC(n)\_SVM.

### Usage

```
ROC.4Figures(Plot,theta1,theta2,h,m,ll,n1,n2,low,high,bin_num,alpha,pi_1,pi_2,rho,kkk)
```

### Arguments

|         |                                                                                                                                                 |
|---------|-------------------------------------------------------------------------------------------------------------------------------------------------|
| Plot    | If True, then the four figures will be plotted.                                                                                                 |
| theta1  | MAF for group 1.                                                                                                                                |
| theta2  | MAF for group 2.                                                                                                                                |
| h       | $h = \theta_1 - \theta_2$                                                                                                                       |
| m       | Number of SNP's.                                                                                                                                |
| ll      | Number of significant SNP's.                                                                                                                    |
| n1      | Sample size in group 1.                                                                                                                         |
| n2      | Sample size in group 2.                                                                                                                         |
| low     | The lower bound for threshold K.                                                                                                                |
| high    | The upper bound for threshold K.                                                                                                                |
| bin_num | Number of threshold K's, so the bin length is $(\text{high} - \text{low}) / \text{bin\_num}$ , and threshold is $\text{low} + i * \text{bin}$ . |
| alpha   | The significant level for SNP selection by Wald test.                                                                                           |
| pi_1    | Percentage of group 1.                                                                                                                          |
| pi_2    | Percentage of group 2.                                                                                                                          |
| rho     | The percentage of significant SNP's.                                                                                                            |
| kkk     | The times of repeat in the simulation.                                                                                                          |

### Details

The ROC figures for PCC(inf), PCC(n)\_f, PCC(n)\_MC, and PCC(n)\_SVM.

### Value

The sample size.

### Author(s)

Xinyu Liu



## References

Liu, X., et al. Sample size determination for classifiers based on single-nucleotide polymorphisms. *Biostatistics* (2012), 13:2, 217-227.

## Examples

```

alpha = 0.1
rho = 1
kkk=200
low=-10
high=200
bin_num=5000
pi_1=pi_2=0.5

n1=n2=30
h=0.1
ll=m=10
theta1 <- rep(0.3,m)
theta2 <- theta1 - h
#ROC.4Figures(TRUE, theta1, theta2, h, m, ll, n1, n2, low, high, bin_num, alpha, pi_1, pi_2, rho, kkk)
#title("h=0.1, m=10, size=60")

n1=n2=200
h=0.1
ll=m=10
theta1 <- rep(0.3,m)
theta2 <- theta1 - h
#ROC.4Figures(TRUE, theta1, theta2, h, m, ll, n1, n2, low, high, bin_num, alpha, pi_1, pi_2, rho, kkk)
#title("h=0.1, m=10, size=200")

n1=n2=30
h=0.1
ll=m=50
theta1 <- rep(0.3,m)
theta2 <- theta1 - h
#ROC.4Figures(TRUE, theta1, theta2, h, m, ll, n1, n2, low, high, bin_num, alpha, pi_1, pi_2, rho, kkk)
#title("h=0.1, m=50, size=60")

n1=n2=200
h=0.1
ll=m=50
theta1 <- rep(0.3,m)
theta2 <- theta1 - h
#ROC.4Figures(TRUE, theta1, theta2, h, m, ll, n1, n2, low, high, bin_num, alpha, pi_1, pi_2, rho, kkk)
#title("h=0.1, m=50, size=200")

n1=n2=30
h=0.2
ll=m=10
theta1 <- rep(0.3,m)
theta2 <- theta1 - h
#ROC.4Figures(TRUE, theta1, theta2, h, m, ll, n1, n2, low, high, bin_num, alpha, pi_1, pi_2, rho, kkk)
#title("h=0.2, m=10, size=60")

n1=n2=30
h=0.2

```

```

ll=m=50
theta1 <- rep(0.3,m)
theta2 <- theta1 - h
#ROC.4Figures(TRUE,theta1,theta2,h,m,ll,n1,n2,low,high,bin_num,alpha,pi_1,pi_2,rho,kkk)
#title("h=0.2, m=50, size=60")

```

---

ROC.infinity.plot      *The ROC plot for under the theoretical maximum PCC.*

---

### Description

The ROC plot for under the theoretical maximum PCC.

### Usage

```
ROC.infinity.plot(theta1, theta2, low=-200, high=200, bin_num=10000, lty=1, lwd=3, col="black", rho)
```

### Arguments

|         |                                                                  |
|---------|------------------------------------------------------------------|
| theta1  | The MAF of case group.                                           |
| theta2  | The MAF of control group.                                        |
| low     | The low level of threshold K, default = -200.                    |
| high    | The upper level of threshold K, default = 200.                   |
| bin_num | The number of bins while spanning the K, default = 10000.        |
| lty     | The style of line on the ROC, default=1.                         |
| lwd     | The width of line on the ROC, default=3.                         |
| col     | The color of the curve, default = "black".                       |
| rho     | The percentage of SNPs with effect on case/control, default = 1. |

### Value

The ROC under PCC(infinity).

### Author(s)

Xinyu Liu

### References

Liu, X., et al. Sample size determination for classifiers based on single-nucleotide polymorphisms. *Biostatistics* (2012), 13:2, 217-227.

**Examples**

```

m <- 10
alpha = 0.01
rho = 1
theta1 <- rep(0.3,m)
h <- 0.2
theta2 <- theta1 - h
ROC.infinity.plot(theta1,theta2,alpha,rho=1)

#####
data(Hapmap51)
rho=1
ROC.infinity.plot(theta1 = Hapmap51$theta1,theta2=Hapmap51$theta2,low=-200, high=200, bin_num=10000, lty=1,

```

ROC.n.plot

*The ROC plot under the linear classifier.***Description**

The ROC plot under the linear classifier.

**Usage**

```
ROC.n.plot(n1,n2,theta1,theta2,low=-200,high=200,bin_num=10000,alpha,lty=1,lwd=3,col="black",rho)
```

**Arguments**

|         |                                                        |
|---------|--------------------------------------------------------|
| n1      | The number of case group.                              |
| n2      | The number of control group.                           |
| theta1  | The MAF of case group.                                 |
| theta2  | The MAF of control group.                              |
| low     | The lower level of the K, default = -200.              |
| high    | The upper level of the K, default = 200.               |
| bin_num | The number of bins in the span of K, default = 10000.  |
| alpha   | The significant level of choosing SNPs, default = 0.1. |
| lty     | The style of the curve, default = 1.                   |
| lwd     | The width of the curve, default = 3.                   |
| col     | The color of ROC, default = "black".                   |
| rho     | The percentage of SNP with effect on case/control      |

**Details**

The ROC under the linear classifier.

**Value**

The ROC under the linear classifier.

**Author(s)**

Xinyu Liu

**References**

Liu, X., et al. Sample size determination for classifiers based on single-nucleotide polymorphisms. *Biostatistics* (2012), 13:2, 217-227.

**Examples**

```
m <- 10
h <- 0.2
alpha = 0.1
theta1 <- rep(0.3, m)
theta2 <- theta1 - h
n1 <- 50
n2 <- 50
ROC.n.plot(n1,n2,theta1,theta2,low=-200,high=200,bin_num=10000,alpha,lty=1,lwd=3,col="black",rho=1)

#####
data(Hapmap51)
n1 <- 50
n2 <- 50
alpha = 0.1
rho = 1
ROC.n.plot(n1,n2,theta1=Hapmap51$theta1,theta2=Hapmap51$theta2,low=-200,high=200,bin_num=10000,alpha,lty=1
```

VUS.inf

*Compute the volumn under hypersurface (VUS) under theoretical maximum PCC, VUS(inf).*

**Description**

Compute the volumn under hypersurface (VUS) under theoretical maximum PCC, VUS(inf).

**Usage**

```
VUS.inf(C,ll,Theta,kk,abserr)
```

**Arguments**

|        |                                                                                   |
|--------|-----------------------------------------------------------------------------------|
| C      | Number of groups.                                                                 |
| ll     | Number of SNP's.                                                                  |
| Theta  | MAF matrix, with m rows and C columns.                                            |
| kk     | The number of random values generated to compute the integration by qhull method. |
| abserr | The cutoff of the error.                                                          |

**Details**

Compute the volumn under hypersurface (VUS) under theoretical maximum PCC, VUS(inf).

**Value**

VUS(inf) value.

**Author(s)**

Xinyu Liu

**References**

Liu, X., et al. Sample size determination for classifiers based on single-nucleotide polymorphisms. *Biostatistics* (2012), 13:2, 217-227.

**Examples**

```
rho = 1
C=3
kk=100
U1=0.4
U2=0.49
Di=0.002
h = 0.1
ll = m = 50
abserr = 0.001
Theta <- Generate.Theta(C,m,U1,U2,h,Di,rho=1)$Theta
#VUS.inf(C,ll,Theta,kk,abserr) # 0.8685009
```

---

VUS.n

*Compute the volumn under hypersurface (VUS) under linear classifier, VUS(n).*

---

**Description**

Compute the volumn under hypersurface (VUS) under linear classifier, VUS(n).

**Usage**

```
VUS.n(C, Theta, alpha, N, m, rho, kk, abserr)
```

**Arguments**

|        |                                                                                   |
|--------|-----------------------------------------------------------------------------------|
| C      | Number of groups.                                                                 |
| Theta  | MAF matrix with m rows and C columns.                                             |
| alpha  | The significant level for Wald test.                                              |
| N      | Matrix for sample size, e.g. matrix(c(n1,n2,n3,...,nC),nrow=C).                   |
| m      | Number of SNP's.                                                                  |
| rho    | The percentage of SNP's with effect on different groups, default = 1.             |
| kk     | The number of random values generated to compute the integration by qhull method. |
| abserr | The cutoff of the error.                                                          |

**Details**

Compute the volumn under hypersurface (VUS) under linear classifier, VUS(n).

**Value**

VUS(n) value.

**Author(s)**

Xinyu Liu

**References**

Liu, X., et al. Sample size determination for classifiers based on single-nucleotide polymorphisms. *Biostatistics* (2012), 13:2, 217-227.

**Examples**

```
rho = 1
alpha=0.01
C=3
kk=100
U1=0.4
U2=0.49
Di=0.002
h = 0.1
ll = m = 50
abserr = 0.001
n = 100
N <- matrix(n,nrow=C,ncol=1)
Theta <- Generate.Theta(C,m,U1,U2,h,Di,rho=1)$Theta
#VUS.inf(C,ll,Theta,kk,abserr)          #0.8686977
#VUS.n(C,Theta,alpha,N,m,rho,kk,abserr) #0.4959834
```

# Index

## \*Topic **datasets**

Hapmap51, [11](#)

Hapmap92, [12](#)

HS348, [13](#)

AUC.inf, [2](#)

AUC.n, [3](#)

AUC.Simulation, [4](#)

Compute.MAF, [5](#)

Find.SS.AUC, [6](#)

Find.SS.PCC, [7](#)

Find.SS.VUS, [9](#)

Generate.Theta, [10](#)

Hapmap51, [11](#)

Hapmap92, [12](#)

HS348, [13](#)

PCC.inf.optimal, [14](#)

PCC.n.optimal, [15](#)

ROC.4Figures, [16](#)

ROC.infinity.plot, [18](#)

ROC.n.plot, [19](#)

VUS.inf, [20](#)

VUS.n, [21](#)
