# Supplementary material for: Determination of sample size for a multi-class classifier based on single-nucleotide polymorphisms: a volume under the surface approach
Source: Springer Nature journal article supplement (doi:10.1186/1471-2105-15-190), 2014-06-14

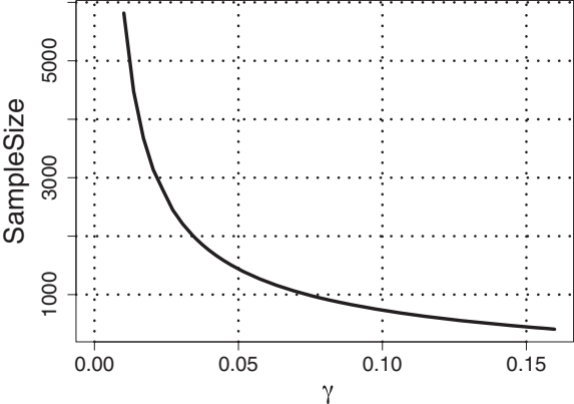

Supplement: 12859_2013_6454_MOESM6_ESM.pdf [file 12859_2013_6454_MOESM6_ESM.pdf]
